# Supplementary material for: Comparative Nutrient Profiling of Retail Goat and Cow Milk
Source: MDPI journal article supplement (doi:10.3390/nu11102282), 2019-09-24
Supplement: s1 [file s1]

## SUPPLEMENTARY MATERIAL

**Table S1.** Means (and average SE) and ANOVA *p*-values for the concentrations of all individual fatty acids of cow and goat retail milk collected, which were quantified in the study

| Fatty acids (% of total) | Cow<br><i>n</i> = 48 | Goat<br><i>n</i> = 36 | SE     | ANOVA<br><i>p</i> -values |
|--------------------------|----------------------|-----------------------|--------|---------------------------|
| C4:0                     | 2.07                 | 1.42                  | 0.043  | <b>&lt;0.001</b>          |
| Unknown                  | 0.017                | 0.013                 | 0.0009 | 0.167                     |
| C5:0                     | 0.021                | 0.011                 | 0.0004 | <b>&lt;0.001</b>          |
| C6:0                     | 1.53                 | 1.70                  | 0.036  | <b>&lt;0.001</b>          |
| C7:0                     | 0.022                | 0.023                 | 0.0008 | 0.473                     |
| C8:0                     | 1.00                 | 2.07                  | 0.033  | <b>&lt;0.001</b>          |
| C9:0                     | 0.029                | 0.049                 | 0.0011 | <b>&lt;0.001</b>          |
| C10:0                    | 2.51                 | 8.00                  | 0.090  | <b>&lt;0.001</b>          |
| c9 C10:1                 | 0.244                | 0.184                 | 0.0050 | <b>&lt;0.001</b>          |
| C11:0                    | 0.055                | 0.075                 | 0.0019 | <b>0.005</b>              |
| C12:0                    | 3.33                 | 4.16                  | 0.079  | <b>0.012</b>              |
| C13:0 iso                | 0.027                | 0.015                 | 0.0006 | <b>0.001</b>              |
| C13:0 anteiso            | 0.015                | 0.008                 | 0.0015 | <b>0.009</b>              |
| c9 C12:1                 | 0.083                | 0.081                 | 0.0021 | 0.742                     |
| C13:0                    | 0.091                | 0.068                 | 0.0015 | <b>0.002</b>              |
| C14:0 iso                | 0.081                | 0.076                 | 0.0011 | 0.102                     |
| C14:0                    | 11.1                 | 10.3                  | 0.09   | <b>0.001</b>              |
| t9 C14:1                 | 0.216                | 0.166                 | 0.0027 | <b>0.001</b>              |
| C15:0 anteiso            | 0.423                | 0.283                 | 0.0072 | <b>&lt;0.001</b>          |
| c9 C14:1                 | 0.931                | 0.157                 | 0.0074 | <b>&lt;0.001</b>          |
| C15:0                    | 1.03                 | 0.73                  | 0.010  | <b>&lt;0.001</b>          |
| C16:0 iso                | 0.199                | 0.225                 | 0.0023 | <b>0.014</b>              |
| C16:0                    | 33.1                 | 30.3                  | 0.31   | <b>0.017</b>              |
| t6+t7+t8 C16:1           | 0.032                | 0.044                 | 0.0013 | <b>0.003</b>              |
| t9 C16:1                 | 0.009                | 0.016                 | 0.0006 | <b>0.014</b>              |
| C17:0 iso                | 0.384                | 0.374                 | 0.0066 | 0.621                     |
| t11+t12+t13 C16:1        | 0.196                | 0.301                 | 0.0036 | <b>&lt;0.001</b>          |
| c9 C16:1 + C17 anteiso   | 1.91                 | 1.05                  | 0.013  | <b>&lt;0.001</b>          |
| c11 C16:1                | 0.143                | 0.019                 | 0.0030 | <b>&lt;0.001</b>          |
| c13 C16:1                | 0.140                | 0.191                 | 0.0066 | <b>0.004</b>              |
| C17:0                    | 0.487                | 0.460                 | 0.0085 | 0.144                     |
| t10 c17:1                | 0.050                | 0.062                 | 0.0022 | <b>&lt;0.001</b>          |
| C18:0 iso                | 0.057                | 0.027                 | 0.0015 | <b>0.002</b>              |
| c9 C17:1                 | 0.211                | 0.221                 | 0.0033 | 0.230                     |
| C18:0                    | 9.95                 | 9.08                  | 0.152  | 0.135                     |
| t4 C18:1                 | 0.016                | 0.009                 | 0.0006 | <b>0.002</b>              |
| t5 C18:1                 | 0.011                | 0.009                 | 0.0004 | 0.119                     |
| t6+t7+t8 C18:1           | 0.276                | 0.223                 | 0.0054 | <b>0.032</b>              |
| t9 C18:1                 | 0.193                | 0.218                 | 0.0058 | <b>0.095</b>              |
| t10 C18:1                | 0.370                | 0.339                 | 0.0218 | 0.532                     |
| t11 C18:1                | 1.22                 | 0.72                  | 0.046  | <b>0.004</b>              |
| c6 + t12 C18:1           | 0.283                | 0.193                 | 0.0105 | <b>0.002</b>              |
| c9 C18:1                 | 20.0                 | 20.4                  | 0.27   | 0.662                     |
| t15 C18:1                | 0.208                | 0.140                 | 0.0113 | <b>&lt;0.001</b>          |
| c11 C18:1                | 0.589                | 0.478                 | 0.0140 | 0.169                     |
| c12 C18:1                | 0.224                | 0.217                 | 0.0067 | 0.778                     |
| c13 C18:1                | 0.091                | 0.055                 | 0.0013 | <b>&lt;0.001</b>          |
| t16 + c14 C18:1          | 0.325                | 0.223                 | 0.0050 | <b>&lt;0.001</b>          |
| c15 C18:1 + C19:0        | 0.127                | 0.088                 | 0.0051 | <b>&lt;0.001</b>          |
| t11t15 C18:2             | 0.027                | 0.003                 | 0.0013 | <b>0.002</b>              |
| t9t12 C18:2              | 0.007                | 0.003                 | 0.0005 | <b>&lt;0.001</b>          |

|                          |       |       |        |                  |
|--------------------------|-------|-------|--------|------------------|
| c9t13 C18:2              | 0.210 | 0.210 | 0.0052 | 0.991            |
| c10t14 C18:2             | 0.110 | 0.047 | 0.0019 | <b>&lt;0.001</b> |
| c9t14 C18:2              | 0.125 | 0.145 | 0.0024 | <b>0.015</b>     |
| c9t12 C18:2              | 0.062 | 0.048 | 0.0010 | <b>0.002</b>     |
| c16 C18:1                | 0.034 | 0.028 | 0.0009 | <b>0.044</b>     |
| t11c15 C18:2             | 0.150 | 0.040 | 0.0060 | <b>0.002</b>     |
| t9c12 C18:2              | 0.019 | 0.009 | 0.0011 | <b>0.002</b>     |
| c9c12 C18:2              | 1.71  | 2.61  | 0.051  | <b>0.015</b>     |
| t12c15 C18:2 + c9 C19:1  | 0.043 | 0.028 | 0.0045 | <b>0.014</b>     |
| C20:0                    | 0.140 | 0.178 | 0.0030 | <b>0.002</b>     |
| c6c9c12 C18:3            | 0.026 | 0.030 | 0.0009 | 0.146            |
| c8 C20:1                 | 0.102 | 0.021 | 0.0010 | <b>&lt;0.001</b> |
| c11 C20:1                | 0.039 | 0.045 | 0.0037 | <b>0.024</b>     |
| c9c12c15 C18:3           | 0.439 | 0.342 | 0.0111 | <b>0.050</b>     |
| c9t11 C18:2              | 0.591 | 0.469 | 0.0198 | <b>0.070</b>     |
| Unknown C18:2 conjugated | 0.029 | 0.028 | 0.0022 | 0.676            |
| Unknown C18:2 conjugated | 0.027 | 0.013 | 0.0014 | <b>0.006</b>     |
| c11c14 C20:2             | 0.020 | 0.017 | 0.0010 | 0.206            |
| C22:0                    | 0.056 | 0.039 | 0.0011 | <b>0.002</b>     |
| c8c11c14 C20:3           | 0.081 | 0.024 | 0.0009 | <b>&lt;0.001</b> |
| c13 C22:1                | 0.016 | 0.010 | 0.0014 | 0.168            |
| c11c14c17 C20:3          | 0.010 | 0.007 | 0.0008 | <b>0.015</b>     |
| c5c8c11c14 C20:4         | 0.106 | 0.159 | 0.0022 | <b>&lt;0.001</b> |
| c13c16 C22:2             | 0.040 | 0.019 | 0.0011 | <b>0.002</b>     |
| c5c8c11c14c17 C20:5      | 0.048 | 0.035 | 0.0012 | <b>0.017</b>     |
| C24:0                    | 0.035 | 0.013 | 0.0006 | <b>&lt;0.001</b> |
| c13c16c19 C22:3          | 0.010 | 0.007 | 0.0007 | <b>&lt;0.001</b> |
| c7c10c13c16 C22:4        | 0.017 | 0.017 | 0.0014 | 0.888            |
| c7c10c13c16c19 C22:5     | 0.079 | 0.075 | 0.0018 | 0.439            |
| c4c7c10c13c16c19 C22:6   | 0.007 | 0.015 | 0.0012 | <b>0.004</b>     |

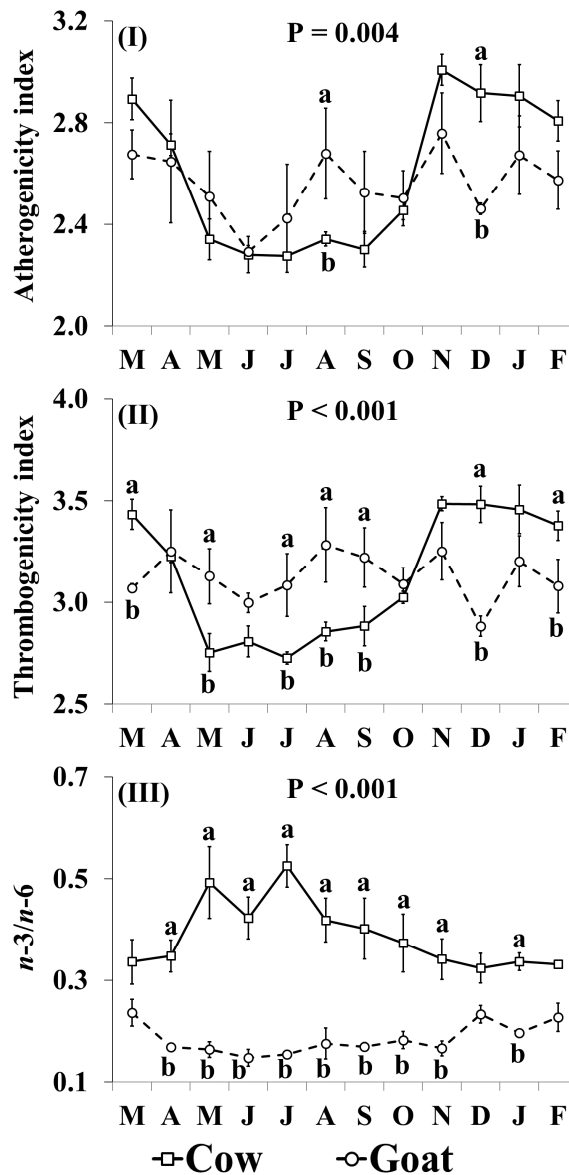

**Figure S1.** Interaction means  $\pm$  SE (error bars) for the effects of species (cow, goat) and month (in order of appearance from left to right in Axis X: M, March; A, April; M, May; J, June; J, July; A, August; S, September; O, October; N, November; D, December; J, January; F, February) on the health indices of retail milk: (I) AI, atherogenicity index<sup>43</sup>; (II) TI, thrombogenicity index<sup>43</sup>; (III)  $n-3/n-6$ , ratio of omega-3 to omega-6 fatty acids. P represents the ANOVA  $p$ -value for the interaction. Means for species and within a month with different lower case letters are significantly different according to Fisher's Least Significant Difference test ( $p < 0.05$ ).

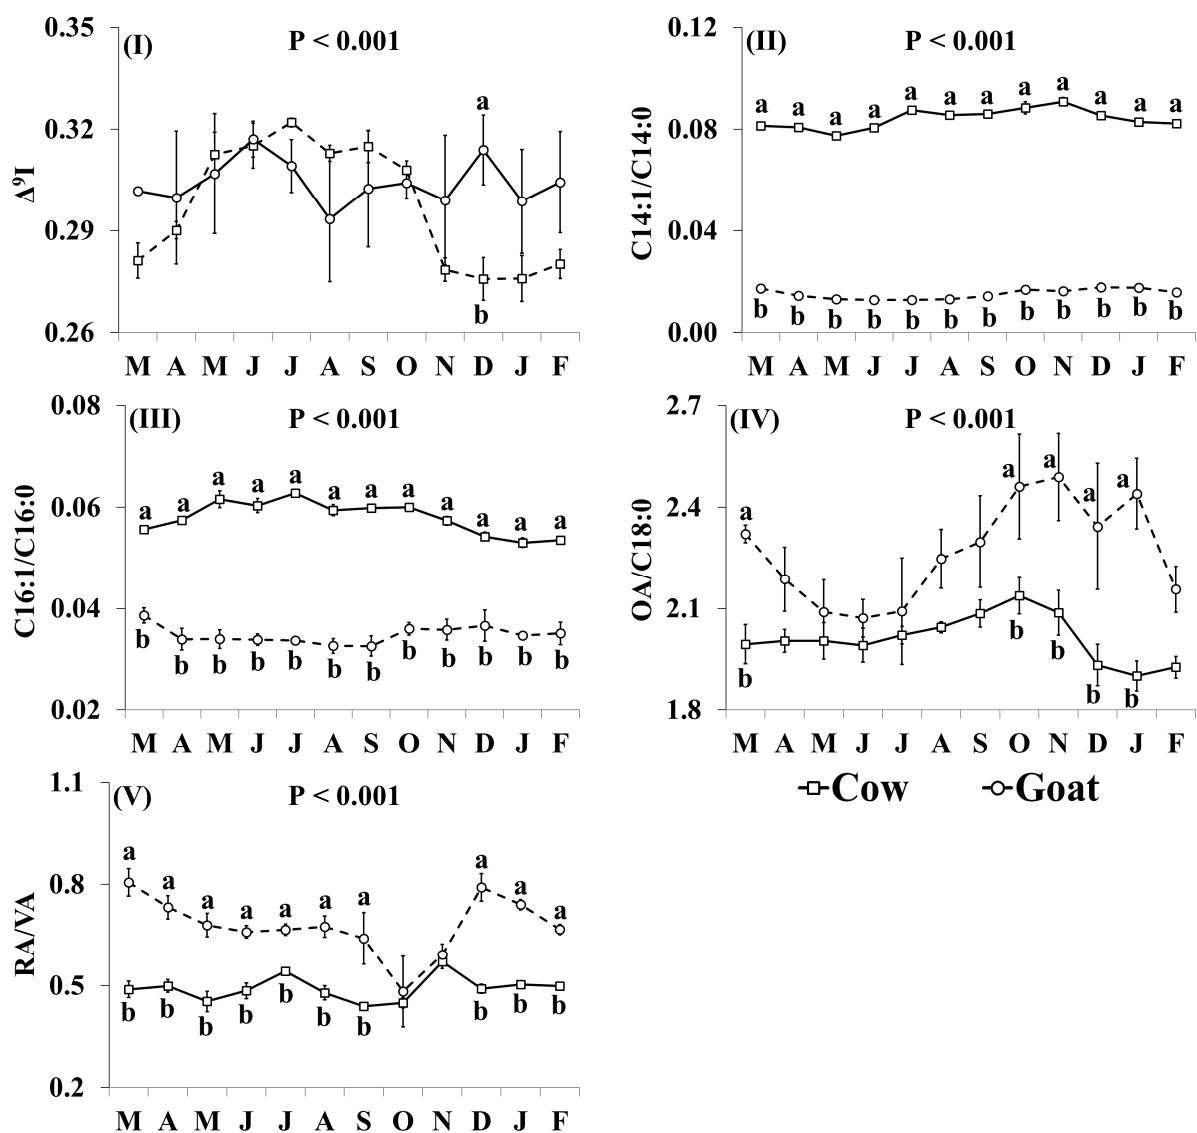

**Figure S2.** Interaction means  $\pm$  SE (error bars) for the effects of species (cow, goat) and month (in order of appearance from left to right in Axis X: M, March; A, April; M, May; J, June; J, July; A, August; S, September; O, October; N, November; D, December; J, January; F, February) on the  $\Delta^9$ -desaturase activity indices: (I)  $\Delta^9I$  was calculated as shown in Kay et al. <sup>36</sup>; (II) ratio of c9 C14:1/C14:0; (III) ratio of c9 C16:1/C16:0; (IV) ratio of c9 C18:1 (OA, oleic acid)/C18:0; (V) ratio of c9t11 C18:2 (RA, rumenic acid)/t11 C18:1 (VA, vaccenic acid) P represents the ANOVA  $p$ -value for the interaction. Means for species and within a month with different lower case letters are significantly different according to Fisher's Least Significant Difference test ( $p < 0.05$ ).
